# Supplementary material
Source: PubMed Central journal article supplement (PMC7612134)
Supplement: EMS140617-supplement-Supplementary_Material.pdf [file EMS140617-supplement-Supplementary_Material.pdf]

Figure S1. (B) Primary sequence alignments between *S. pombe* Pob3 (SSRP1) and select eukaryotic orthologues

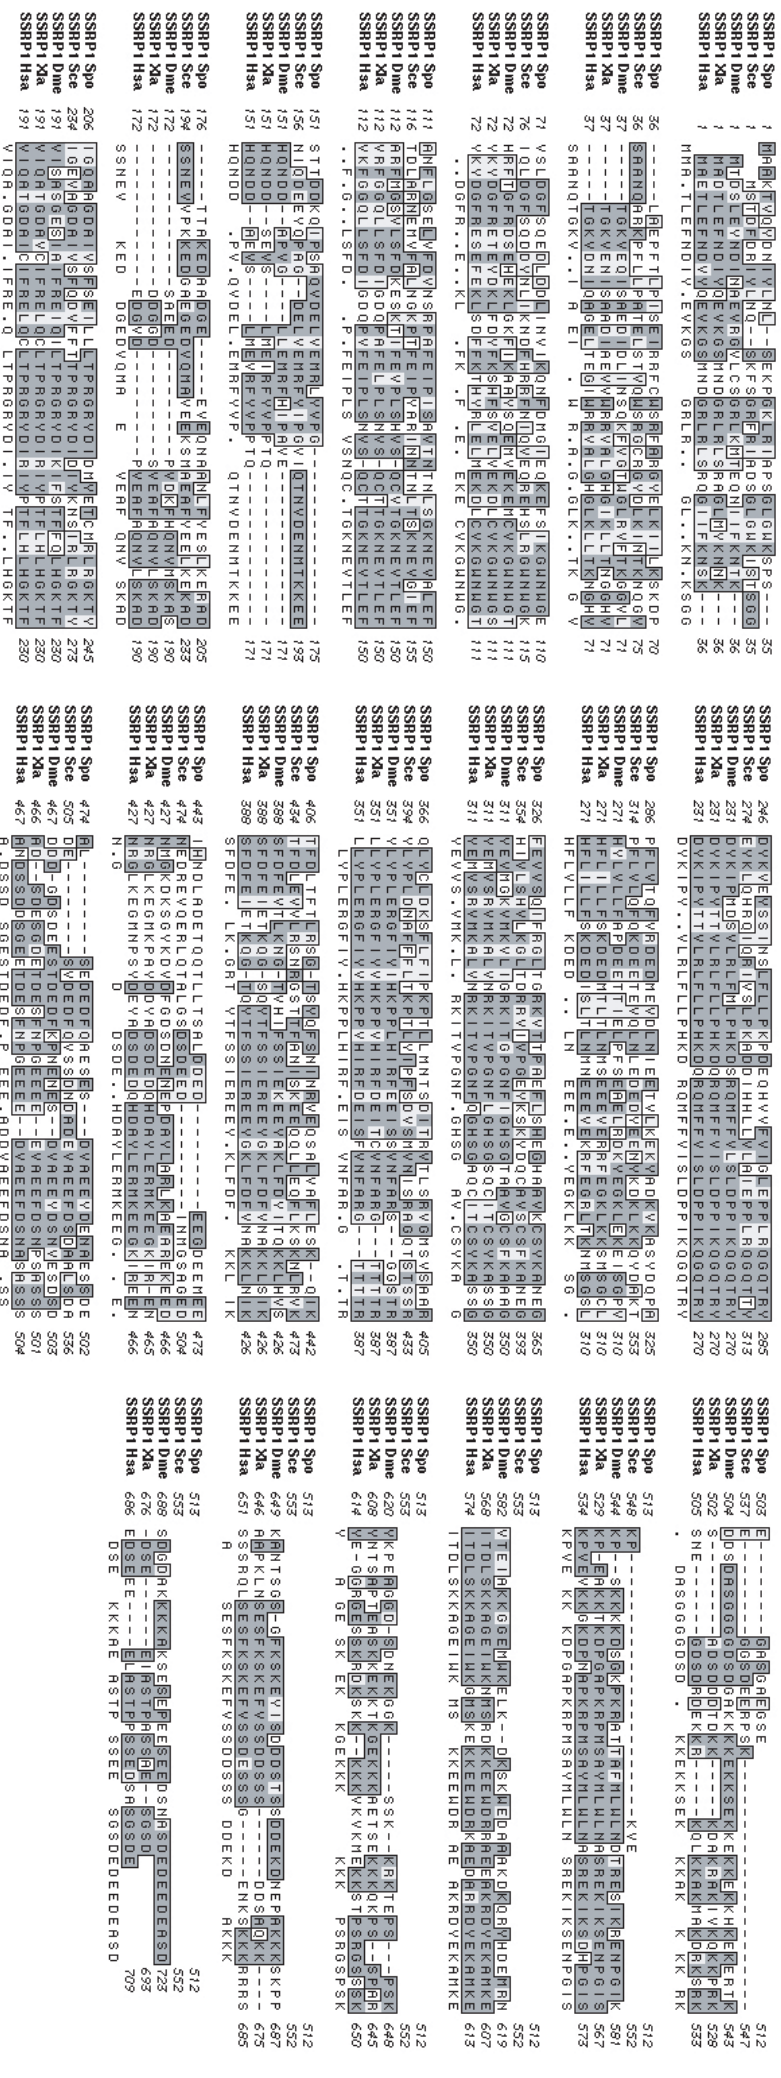

## Figure S2

**A**

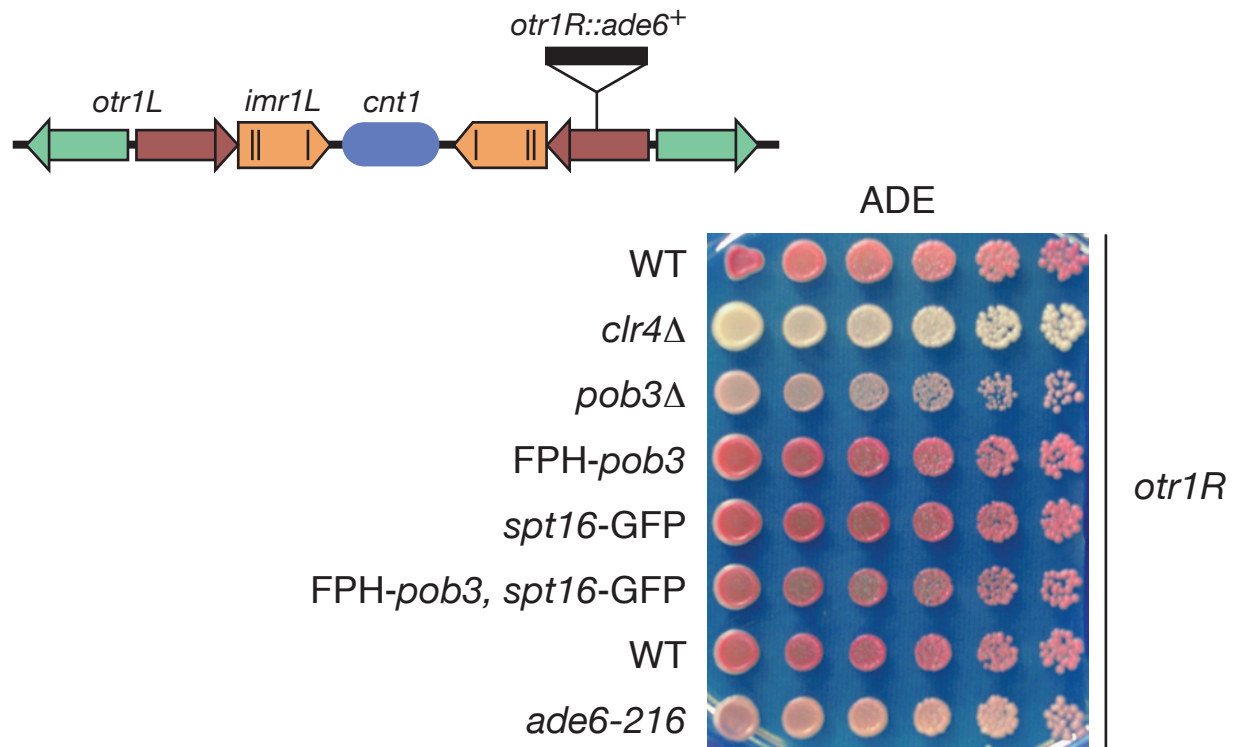

**B**

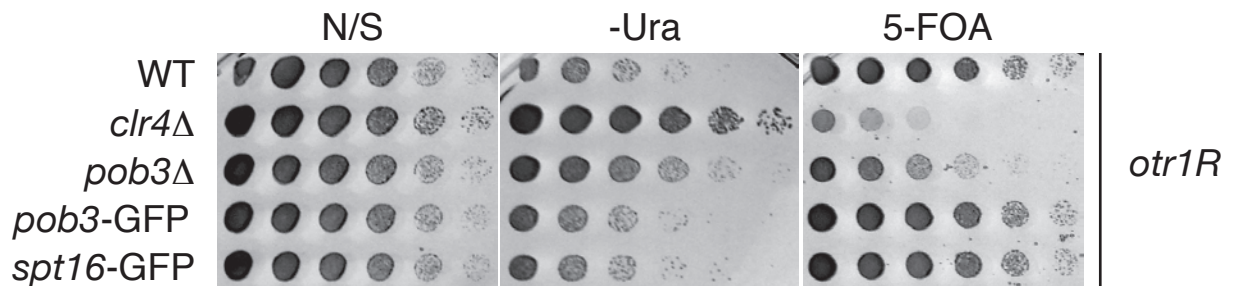

**Figure S2. Tagged isoforms of the *S. pombe* Pob3 and Spt16 proteins are functional.**

(A) Tagged FPH-Pob3, Spt16-GFP and double tagged strains are functional in the ADE-colorimetric centromere silencing assay.

(B) Pob3-GFP and Spt16-GFP fusion proteins do not affect centromeric silencing. Serial dilutions of wild-type (WT), *clr4Δ*, *pob3Δ*, *pob3*-GFP and *spt16*-GFP strains.

## Figure S3

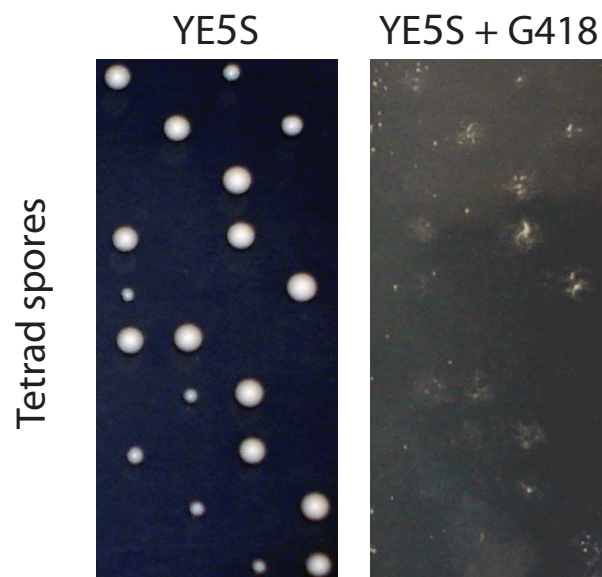

### Figure S3. *spt16+* is an essential gene.

Tetrads dissected from the diploid *spt16::kanMX6/spt16+* were grown on YE5S media at 32 degrees Celsius for 2 days. All growing spore clones were G418 sensitive.

**Figure S4**

**Strain EL44 = *pob3+::KanMX6* construction & verification**

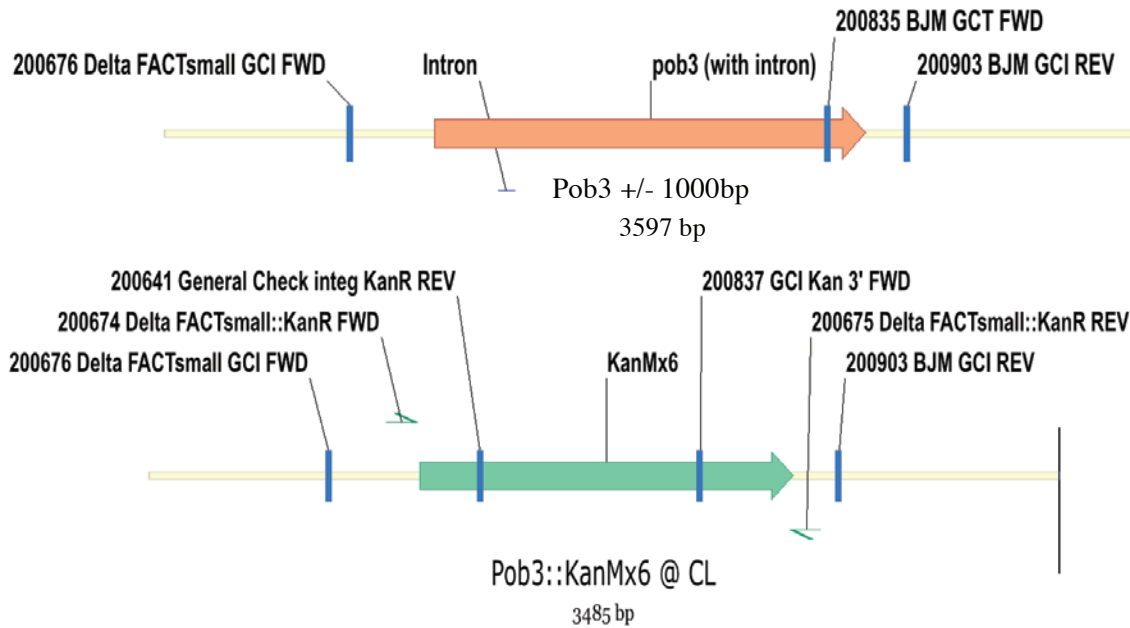

(a) Primers to amplify the KanR deletion cassette for *pob3+::KanMX6* strain

**200674 Delta FACTsmall::KanR FWD**

AATGTGTTAATGTGTGAATTTGAGAATAACCTGGTATAGCTGTTTTCTGACCA  
 AATACTTAATACTTCACCAGTTATAAAAAATGCGGATCCCCGGGTTAATTAA  
 (includes the *pob3*'s ATG) anneals on the Kanamycin-containing plasmid

**200675 Delta FACTsmall::KanR REV**

AATTTGTAATAGCAAAAGACAAGGCTGAAAAGTTGATCCAAATAGACTTCCA  
 ATTTAACATTGCTCAATTTTATAGATCATTAGAATTCGAGCTCGTTTAAAC  
 (includes the *pob3*'s TAA) anneals on the Kanamycin-containing plasmid

(b) Primers to check *pob3+::KanMX6* deletion by PCR on the 5' end and 3' end

**200676 Delta FACTsmall GCI FWD**

GCT GAA CCT CGT TCC TCA G

**200641 General Check integ KanR REV**

CAA TTC AAC GCG TCT GTG AGG

**200837 GCI KAN 3' FWD**

TAT GGA ACT GCC TCG GTG AG

**200903 BJM GCI REV**

TTT ACC ACT CGG ATT CAT CG

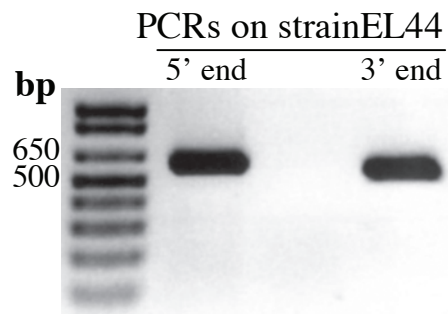

5' end (200676/200641) expected amplicon: 604bp

3' end (200903/200837) expected amplicon: 552bp

A

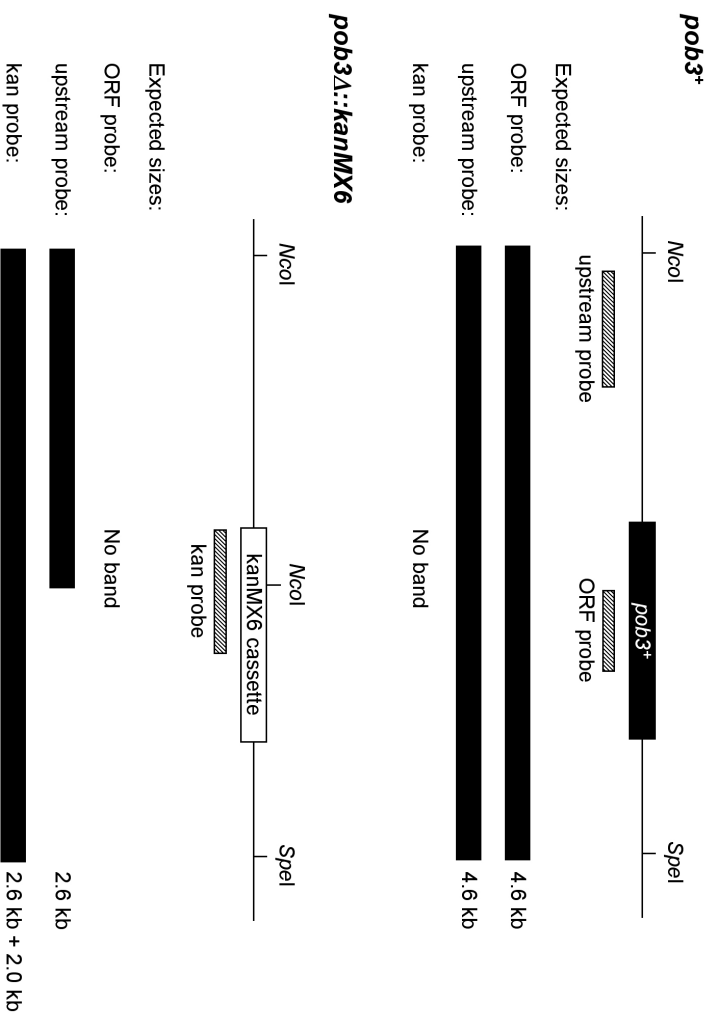

B

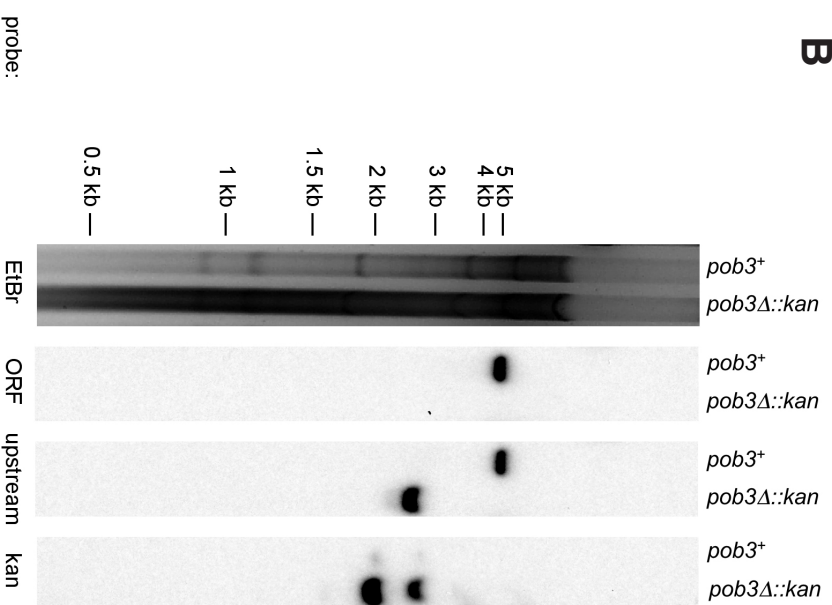

**Figure S5. Southern blot verification of *pob3+* gene deletion in *S. pombe*.**

(A) Diagram showing the wild-type *pob3+* strain and *pob3Δ::kanMX6* knockout strain, including the probes and expected sizes of DNA fragments obtained by restriction enzymes *NcoI* and *SpeI*.

(B) Southern blot for *pob3+* and *pob3Δ::kanMX6* strains using the indicated radiolabelled ORF, upstream and kan probes.

## Figure S6

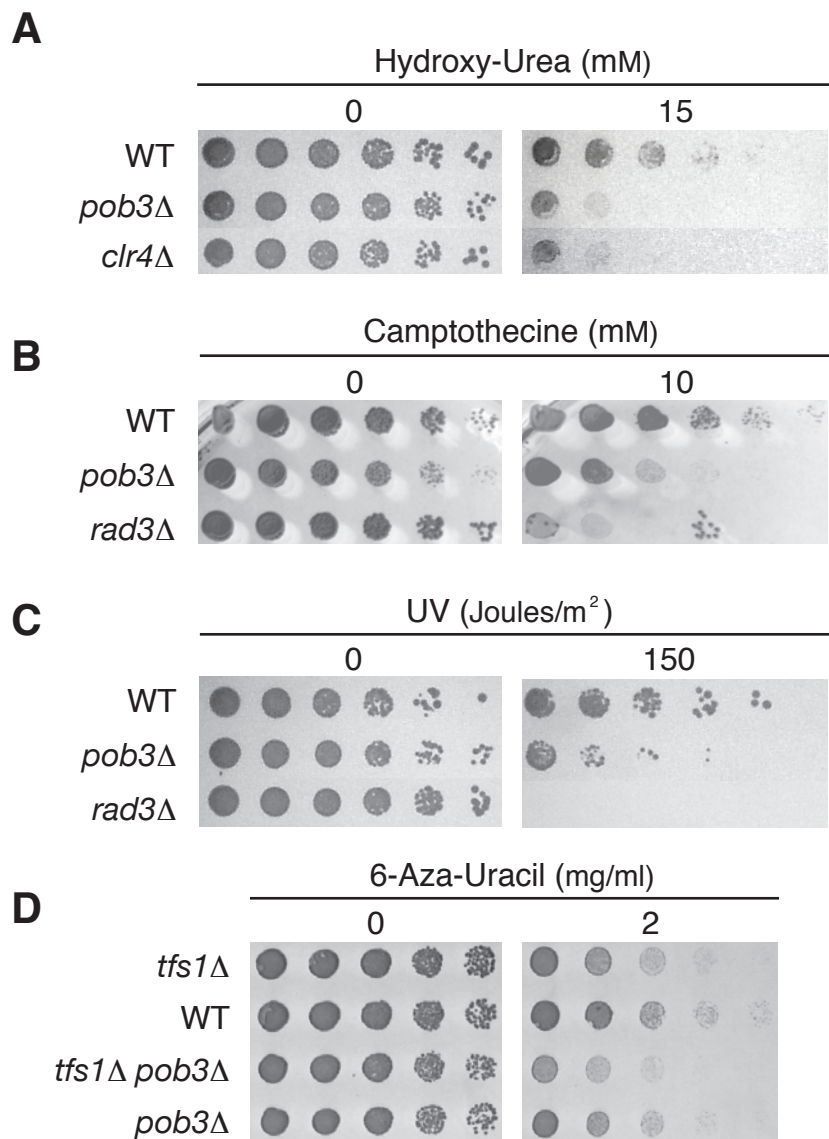

**Figure S6. The small subunit of the *S. pombe* chromatin remodeling complex FACT (Pob3) has a role in genome stability.**

Sensitivity of wild-type, *pob3*Δ deletion and reference yeast strains to:  
(A) Hydroxyurea (HU), which reveals defects in DNA replication.  
(B) camptothecine (CPT) and (C) ultra-violet (UV) radiation, both of which reveal defects in controlling induced DNA damage.  
(D) 6-aza-uracil (6AU), a small molecule that affects intracellular GTP levels and is commonly used to screen for mutants affecting transcript elongation.

## Figure S7

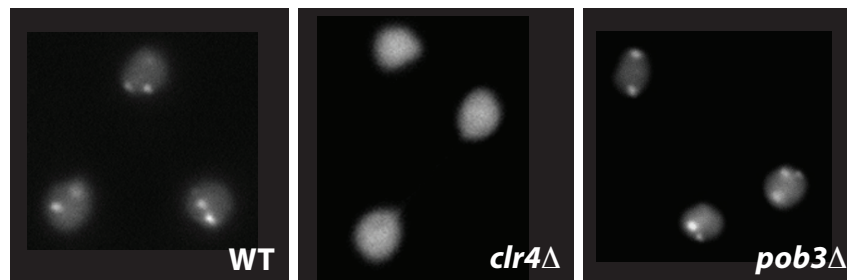

**Figure S7.** GFP-Swi6 delocalization assay.

GFP-Swi6 is functional and a good marker for centromeres and telomeres (Pidoux *et al.*, 2000).

GFP-Swi6 fluorescence images of wild-type (WT), *clr4Δ* and *pob3Δ* cells. GFP-Swi6 is delocalized from centromeres and telomeres in *clr4Δ* mutants, as opposed to WT and *pob3Δ* cells.



**Table S1. Gene expression profiling of a *pob3Δ* strain relative to wild-type *S. pombe*.**

| <b>LOWER expression in <i>pob3Δ</i> versus WT. 2-fold cut-off (3 of 4 data points):</b>  |                                                                                                                                                                                         |
|------------------------------------------------------------------------------------------|-----------------------------------------------------------------------------------------------------------------------------------------------------------------------------------------|
| 15 genes (total)                                                                         |                                                                                                                                                                                         |
| <b>Gene Name</b>                                                                         | <b>Gene dB Product description</b>                                                                                                                                                      |
| SPCC965.14c                                                                              | putative cytidine and deoxycytidylate deaminase zinc-binding protein                                                                                                                    |
| SPAC644.05c                                                                              | putative deoxyuridine 5'-triphosphate nucleotidohydrolase (EC 3.6.1.23); dUTP pyrophosphatase                                                                                           |
| <i>rps10-2</i>                                                                           | 40S ribosomal protein S10                                                                                                                                                               |
| <i>soul</i>                                                                              | sorbitol utilization protein soul1; short chain dehydrogenase                                                                                                                           |
| SPAC926.05c                                                                              | dnaj protein                                                                                                                                                                            |
| SPBC609.05<br>= <i>pob3</i>                                                              | similar to <i>S. cerevisiae</i> POB3 protein that binds to DNA polymerase I; putative structure specific recognition protein                                                            |
| SPAC1B3.16c                                                                              | MFS transporter of unknown specificity                                                                                                                                                  |
| SPAC5D6.05                                                                               | Protein that plays a role in cell separation, mating and differentiation                                                                                                                |
| SPAC694.03                                                                               | hypothetical protein; similar to <i>S. cerevisiae</i> YCL047C                                                                                                                           |
| SPAC29B12.04                                                                             | putative pyridoxine (vitamin B6) biosynthetic enzyme; by similarity to yeast <i>snz1</i>                                                                                                |
| SPCC622.19                                                                               | hypothetical protein; (conserved in fungi- Gaillardin et al)                                                                                                                            |
| SPBC146.08c                                                                              | putative elongation initiation factor eIF1a                                                                                                                                             |
| SPBP23A10.03c                                                                            | hypothetical protein; similar to <i>S. cerevisiae</i> YDR511W                                                                                                                           |
| <i>vti1</i>                                                                              | putative vesicle transport V-snare protein                                                                                                                                              |
| SPBC1709.06                                                                              | conserved hypothetical protein; UPF0034 family                                                                                                                                          |
| <b>HIGHER expression in <i>pob3Δ</i> versus WT. 2-fold cut-off (3 of 4 data points):</b> |                                                                                                                                                                                         |
| 44 genes (total)                                                                         |                                                                                                                                                                                         |
| <b>Gene Name</b>                                                                         | <b>Gene dB Product description</b>                                                                                                                                                      |
| <i>fiol1</i>                                                                             | iron transport multi-copper oxidase precursor                                                                                                                                           |
| <i>hsp9</i>                                                                              | heat shock protein hsp9                                                                                                                                                                 |
| <i>hsp16</i>                                                                             | heat shock protein hsp16                                                                                                                                                                |
| SPAC29A4.06c                                                                             | hypothetical protein; contains Pfam-B_33047; shares conserved region with <i>Drosophila</i> CG15747; <i>Arabidopsis</i> F12K2.14; and <i>C. elegans</i> C16C10.6; predicted coiled-coil |
| <i>cox1</i>                                                                              |                                                                                                                                                                                         |
| <i>lys7</i>                                                                              | putative alpha-aminoadipate reductase small chain, sixth step in lysine biosynthesis pathway- from ACPS domain                                                                          |
| <i>fip1</i>                                                                              | iron permease                                                                                                                                                                           |
| <i>frp1</i>                                                                              | ferric reductase transmembrane componen                                                                                                                                                 |
| SPAC212.06c                                                                              | pseudogene; truncated C-terminal of DNA helicase in rearranged telomeric region                                                                                                         |
| SPAC212.08c                                                                              | hypothetical protein; possibly <i>S. pombe</i> specific; duplicated in telomeric region; contains N-term predicted signal sequence                                                      |
| SPAC212.11                                                                               | DNA helicase possibly pseudo                                                                                                                                                            |
| SPAC1F8.03c                                                                              | MFS efflux transporter of unknown specificity                                                                                                                                           |
| SPAC750.07c                                                                              | very hypothetical protein                                                                                                                                                               |
| SPAC1834.10c                                                                             | hypothetical protein; sequence orphan                                                                                                                                                   |

|               |                                                                                                                                                                                                                                                          |
|---------------|----------------------------------------------------------------------------------------------------------------------------------------------------------------------------------------------------------------------------------------------------------|
| SPAC1782.01   | similar to <i>S. cerevisiae</i> Ecm29 cell wall stucture/biosynthesis protein                                                                                                                                                                            |
| SPAC22F8.12c  | hypothetical protein; serine-rich protein; sequence orphan; predicted N-terminal signal sequence                                                                                                                                                         |
| <i>pim1</i>   | putative peptide transporter                                                                                                                                                                                                                             |
| SPAC1002.19   | putative GTP cyclohydrolase; riboflavin biosynthesis                                                                                                                                                                                                     |
| SPCC338.12    | putative proteinase precursor                                                                                                                                                                                                                            |
| SPAC9E9.04    | conserved hypothetical protein; putative endoplasmic reticulum transmembrane protein; similar to <i>S. cerevisiae</i> YET1; contains predicted N-term signal sequence; contains 2 predicted transmembrane helices; contains predicted C-term coiled-coil |
| SPCC965.07c   | Glutathione S-transferase                                                                                                                                                                                                                                |
| <i>srp14</i>  | signal recognition particle 14 kda protein                                                                                                                                                                                                               |
| SPAC11H11.05c | very hypothetical protein                                                                                                                                                                                                                                |
| SPAC1002.17c  | probable uracil phosphoribosyltransferase                                                                                                                                                                                                                |
| SPBPJ4664.02  | hypothetical protein; sequence orphan; low similarity to glycoamylases and other cell surface proteins; contains ~250-270 copies of a 13 AA repeat, NSSTPITSSSIL; contains predicted N-terminal signal sequence                                          |
| SPAC22F8.05   | putative alpha,alpha-trehalose-phosphate synthase                                                                                                                                                                                                        |
| SPBC1921.06c  | hypothetical protein; sequence orphan; contains predictd N-term signal sequence                                                                                                                                                                          |
| SPBC27B12.03c | putative c-5 sterol desaturase                                                                                                                                                                                                                           |
| SPCC1739.08c  | short chain dehydrogenase; putative sorbitol utilization                                                                                                                                                                                                 |
| SPAPB1A11.03  | putative FMN dependent dehydrogenase; similar to lactate dehydrogenase                                                                                                                                                                                   |
| SPAC19G12.09  | putative aldose reductase                                                                                                                                                                                                                                |
| SPBC557.06c   |                                                                                                                                                                                                                                                          |
| <i>leu2</i>   | 3-isopropylmalate dehydratase                                                                                                                                                                                                                            |
| <i>rpn10</i>  | 19s proteasome regulatory subunit                                                                                                                                                                                                                        |
| <i>klp8</i>   | kinesin-like protein                                                                                                                                                                                                                                     |
| SPAC12B10.10  | hypothetical protein; sequence orphan; predicted C-term coiled-coil region                                                                                                                                                                               |
| <i>sec24</i>  | putative component of the COPII coat; involved in endoplasmic reticulum to Golgi transport                                                                                                                                                               |
| <i>cdc16</i>  | cell division control protein 16; spindle assembly checkpoint component; GTPase-activating protein (GAP) for Spg1p GTPase; essential;two-component GEF for the GTPase spg1 (with byr4)                                                                   |
| SPBPB2B2.01   | putative amino-acid permease                                                                                                                                                                                                                             |
| SPAC637.03    | hypothetical protein; sequence orphan; contains 8 predicted transmembrane segments contains predicted N-term signal sequence                                                                                                                             |
| SPBC21D10.10  | bromodomain protein                                                                                                                                                                                                                                      |
| SPBC887.16    | very hypothetical protein                                                                                                                                                                                                                                |
| SPAC27D7.05c  | hypothetical protein; sequence orphan; has transcript from microarray                                                                                                                                                                                    |
| SPAC27D7.06   | putative electron transfer flavoprotein alpha-subunit precursor                                                                                                                                                                                          |

**Table S2. Hyper-geometric probability comparisons of genes either up- or down-regulated in *pob3* deletion cells.**

| <b>HIGH expression in <i>pob3Δ</i> cut 2.0 (3 of 4)</b> |                                                       | <b>44 genes in list</b> |                         |                                                            |
|---------------------------------------------------------|-------------------------------------------------------|-------------------------|-------------------------|------------------------------------------------------------|
| <b>P-value</b>                                          | <b>Similar List Name</b>                              | <b>Genes in list</b>    | <b>Genes in overlap</b> | <b>Reference for gene list</b>                             |
| 1,07e-7                                                 | HIGH expression in <i>rpb7-G150D</i> cut 1.5 (6 of 8) | 62                      | 10                      | Djupedal <i>et al</i> (2005), <i>Genes Dev</i> , 19, 2301  |
| 2,56e-6                                                 | HIGH expression in <i>chr3D</i> cut 1.5               | 61                      | 9                       | Hansen <i>et al</i> (2005), <i>Mol Cell Biol</i> , 25, 590 |
| 0,000136                                                | HIGH expression in pSwi6 cut 1.5 (3 of 4)             | 254                     | 13                      | Wiren <i>et al</i> (2005), <i>EMBO J</i> , 17, 2906        |
| 0,00162                                                 | HIGH expression in <i>chr6-1</i> cut 2.0 (6 of 10)    | 63                      | 7                       | Wiren <i>et al</i> (2005), <i>EMBO J</i> , 17, 2906        |
| 0,00318                                                 | HIGH expression in <i>chr6-1 chr3D</i> cut 1.5        | 570                     | 17                      | Hansen <i>et al</i> (2005), <i>Mol Cell Biol</i> , 25, 590 |
| 0,00472                                                 | HIGH expression in <i>chr1D</i> cut 1.5               | 47                      | 8                       | Hansen <i>et al</i> (2005), <i>Mol Cell Biol</i> , 25, 590 |
| 0,00518                                                 | HIGH expression in <i>chr4-681</i> cut1.5             | 107                     | 8                       | Hansen <i>et al</i> (2005), <i>Mol Cell Biol</i> , 25, 590 |
| 0,0109                                                  | LOW IGR WT H4K16Ac H3 Cter corr cut 1.5               | 1267                    | 24                      | Wiren <i>et al</i> (2005), <i>EMBO J</i> , 17, 2906        |
| 0,0115                                                  | LOW IGR WT H4K5Ac H3 Cter corr cut 1.5                | 1110                    | 22                      | Wiren <i>et al</i> (2005), <i>EMBO J</i> , 17, 2906        |
| 0,0115                                                  | HIGH expression in <i>chr6-1</i> (6 of 10) cut 1.5    | 253                     | 11                      | Wiren <i>et al</i> (2005), <i>EMBO J</i> , 17, 2906        |
| 0,0309                                                  | LOW IGR WT H4K12Ac H3 Cter corr cut 1.5               | 1083                    | 21                      | Wiren <i>et al</i> (2005), <i>EMBO J</i> , 17, 2906        |
| 0,0356                                                  | HIGH expression in <i>chr3-735</i> cut1.5             | 183                     | 9                       | Hansen <i>et al</i> (2005), <i>Mol Cell Biol</i> , 25, 590 |

**LOW expression in *pob3Δ* cut 2.0 (3 of 4)**

**15 genes in list**

| <b>P-value</b> | <b>Similar List Name</b>                             | <b>Genes in list</b> | <b>Genes in overlap</b> | <b>Ref. for gene list</b>                                 |
|----------------|------------------------------------------------------|----------------------|-------------------------|-----------------------------------------------------------|
| 0,0229         | LOW expression in <i>rpb7-G150D</i> cut 1.5 (6 of 8) | 47                   | 4                       | Djupedal <i>et al</i> (2005), <i>Genes Dev</i> , 19, 2301 |

*For methods section:* Similar gene lists were identified using the automatic hyper-geometric distribution tests in the gene list inspector function of Gene Spring v7.2 software (Silicon Genetics). The hyper-geometric distribution test calculates the probability of overlap corresponding to *k* or more genes between a list of *n* genes compared against another gene list of *m* fragments when randomly sampled from a universe of *u* genes:

$$\frac{1}{\binom{u}{m}} \sum_{i=k}^n \binom{m}{i} \binom{u-m}{n-i}$$

Table S3

## Strain list (main figures)

| Strain | Genotype                                                                                                            |
|--------|---------------------------------------------------------------------------------------------------------------------|
| EL18   | h+ leu1-32,ade6-216, ura4D18, imr1R(Nco)::ura4+,                                                                    |
| EL32   | h+ clr4::kanMX6+, imr1R(Nco)::ura4+, leu1-32, ade6-216, ura4D18                                                     |
| EL44   | h+ pob3::kanMX6+, imr1R(Nco)::ura4+, ade6-216, leu1-32, ura4D18                                                     |
| EL87   | h- pob3::kanMX6, imr1R(Nco)::ura4+, leu1-32, ade6-210, ura4D18                                                      |
| EL93   | h+ pob3::kanMX6, otr1R(SphI)::ura4, ade6-210, his3D1?, leu1-32, ura4DS/E                                            |
| EL102  | h? pob3::kanMX6, mat3M::ura4, ade6-210, arg3D4, leu1-32, ura4D18                                                    |
| EL105  | h? pob3::kanMX6, (rDNA:ura4) Ylp2.4pUCura4.7, ade6-210, leu1-32, his3D1, ura4DS/E,                                  |
| EL107  | h? pob3::kanMX6, otr2:ura4+ ?, TM1:arg3+, TM3:ade6+ ?, tel:his3+, ade6-210, arg3D4, leu1-32, his3D1, ura4D18/DS/E ? |
| EL127  | h- spt16-GFP-kanMX6, otr1R (SphI)::ura4, arg3D4, his3D1, leu1-32, ura4DS/E                                          |
| EL130  | h- pob3-GFP-kanMX6, otr1R (SphI)::ura4, arg3D4, his3D1, leu1-32, ura4DS/E                                           |
| EL238  | h- pob3::natMX6, ade6-210, arg3D4, his3D1, leu1-32, ura4DS/E                                                        |
| EL243  | h? pob3::kanMX6, otr1R(SphI):ade6, ade6-210, leu1-32, ura4D18/DS-E?                                                 |
| EL306  | h+ FPH-pob3, otr1R(SphI):ade6, ade6-210, leu1-32, ura4-D18                                                          |
| EL319  | h? pob3::kanMX6, dcr1::natMX6, otr1R:ura4, ade6-210, his?, leu?, ura4D18/DS-E?                                      |
| EL332  | h? pob3::kanMX6, [CM3112 sup3e], ade6-704, arg3D4?, leu1-32, his3D1, ura4-D18                                       |
| EL344  | h? FPH-pob3, spt16-GFP-kanMX6, otr1R(SphI):ade6, ade6-210, arg3D4?, his3D1?, leu1-32, ura4D18                       |
| EL348  | h? pob3::natMX6, [Ch16 ade6-216 m23::ura4], ade6-210, arg3D4?, his3D1?, leu1-32, ura4DS/E                           |
| FY511  | h90 mat3-M::ura4, ade6-216, leu1-32, ura4-D18                                                                       |
| FY521  | h- [Ch16 ade6-216 m23::ura4], ade6-210, leu1-32, ura4DS/E                                                           |
| FY1034 | h? swi6::his1, otr1R (dg-glu BamHI-Spe1 fragment) SphI::ura4, ade6-210, his1-102, leu1-32, ura4-DS/E                |
| FY1180 | h+ otr1R(dg-glu)SphI:ade6, ade6-210, leu1-32, ura4-D18                                                              |
| FY2116 | h- [CM3112 sup3e], ade6-704, his3D1, leu1-32, ura4-D18                                                              |
| FY3027 | h+ TM1::arg3, TM3::ade6, tel::his3, otr2::ura4, ade6-210, arg3D4, his3D1, leu1-32, ura4-D18/DS-E?                   |
| FY3606 | h? rik1::leu2, TM1::arg3, TM3::ade6, otr2::ura4, his3::tel, ade6-210, arg3D4, his3D1, leu1-32, ura4D18              |
| FY4134 | h- ade6-210, arg3D4, his3D1, leu1-32, ura4DS/E                                                                      |
| FY4841 | h- otr1R(SphI)::ura4, arg3D4, his3D1, leu1-32, ura4DS/E                                                             |
| FY6084 | h- clr4::LEU2+, otr1R(SphI):ura4 ura4D/SE, leu1-32, ade6-210/216?                                                   |
| FY6603 | h+ Ylp2.4pUCura4.7, ura4-DS/E, leu1-32, ade6-216                                                                    |
| FY6802 | h+ tas3::kanMX6, imr1R(Nco1)::ura4+, ade6-216, leu1-32, ura4D18/DS-E?                                               |
| FY7036 | h- dcr1::natMX6, otr1R(dg-glu)SphI:ade6, ade6-210, his3D1?, leu1-32?, ura4D18/DS-E?                                 |

## Strain list (Supplementary figures)

| Strain | Genotype                                                                                            |
|--------|-----------------------------------------------------------------------------------------------------|
| EL63   | h+ ade6-210 leu1-32                                                                                 |
| EL90   | h+ pob3::kanMX6, ade6-210, arg3D4, his3D1, leu1-32, ura4D18                                         |
| EL98   | h? pob3::kanMX6, ars1(Mlu)::pREP81X-gfp-swi6-LEU2+, ade6-210/216?, leu1-32, ura4-D18                |
| EL111  | h+ pob3::kanMX6, ade6-210, leu1-32                                                                  |
| EL115  | h? pob3::kanMX6, tfs1::LEU2+, ade6-210, leu1-32, can1-1?                                            |
| EL173  | h+ tfs1::natMX6, ade6-210, leu1-32                                                                  |
| EL229  | h? clr4::LEU2+ otr1R(Sph1):ade6+, ade6-210/216?, leu1-32, ura4D18/DS-E?                             |
| EL345  | h? FPH-pob3, spt16-GFP-kanMX6, otr1R(dg-glu)SphI:ade6, ade6-210, arg3D4?, his3D1?, leu1-32, ura4D18 |
| EL351  | h? spt16-GFP-KanMX6, otr1R(dg-glu)Sph1:ade6, ade6-210, arg3D4?, his3D1?, leu1-32, ura4D18/DS-E?     |
| EL355  | h+/h+ spt16::KanMX6/ORF, ade6-M210/ade6-M216, ura4D18/ura4D18, leu1-32/leu1-32                      |
| FY1665 | h- rad3::ura4+, ade6-704, leu1-32, ura4-D18                                                         |
| FY2214 | h- ars1(Mlu)::pREP81Xgfpswi6 LEU2+, ade6-210, leu1-32, ura4-D18                                     |
| FY3300 | h? clr4 :: ura4 ars1(Mlu)::pREP81Xgfpswi6-LEU2+, ade6-210/216?, leu1-32, ura4D18/DS-E?              |
